# Supplementary material for: Factors associated with utilization of oral health services among adults aged 18–70 years in Lira district, Northern Uganda: a community based cross-sectional study
Source: PubMed Central journal article supplement — BMC Oral Health. 2024 Oct 30;24:1322. doi: 10.1186/s12903-024-05082-z (PMC11523656; doi:10.1186/s12903-024-05082-z), 2024-10-30
Supplement: 12903_2024_5082_MOESM1_ESM.pdf [file 12903_2024_5082_MOESM1_ESM.pdf]

# utilization of dental services 11

I am Stephen Ojok, studying at Lira University. I am doing a research on Utilization of Dental services and associated factors among adults 18-45 years in Lira District since Dental diseases are very common in this country and in this region. I am going to give you information and invite you to be part of this research. You do not have to decide today whether or not you will participate in the research. Before you decide, you can talk to anyone you feel comfortable with about the research. Participants will be given the informed consent form to fill in case they accept to participate in the study. The interviewer will then ask the participant to find a convenient place to administer the questionnaire. The interview will take about 15-20 minutes. If you have any questions related to the study as a research participant, you can contact the principal investigator, OJOK STEPHEN on telephone number+256777809652 or via email on [ojokstephen80@gmail.com](mailto:ojokstephen80@gmail.com) . Do you accept to participate in the study

*musinguzimarvin*

- accept
- I dont Accept

## Socio demographics

### What is your age

*age in copleted years*

*musinguzimarvin*

18

### What is your gender?

- Male
- Female

### What is Your Marital status?

- Married
- Un married

### What is your education level

- Primary
- Secondary
- Tertiary
- None

### Where are you staying apparentlyly

*current residence*

- Rural
- Urban

**What is your employment status?**

- Employed
- Un Employed

**What is your monthly income**

---

**level of utilization**

**Have you ever gone to any facility for dental services?**

*at any time*

- No
- Yes

**when did you last visit**

*which year and month*

*musinguzimarvin*

yyyy-mm

---

**which services did you access at that time**

*select more than one*

*musinguzimarvin*

- Health Education
- Dental check up
- Exaction
- Tooth filling/cementing
- Tooth Cleaning
- Teeth whitening
- Flussing
- Artificial teeth
- Teeth alignment
- Fracture reduction
- others

**please specify the service**

---

## individual factors

**which of the following is a common oral disease?**

- Gum disease and Dental caries (cavities on the teeth)
- Missing teeth
- I don't know

**Which of the following facilities offer dental services?**

- HCIV
- HCIII
- I don't know

**How often should you visit a dental clinic?**

- evrey 6 months
- when your sick
- I don't know

**What should you do when your tooth is arching?**

- Visit a dentist
- Get herbal medicine
- Get a pain killer

**Does lira city have all the dental services you may require?**

- Yes
- No
- Not sure

**Is it normal for gums to bleed during brushing?**

- No
- yes
- I don't know

**Is it normal for gums to turn red some times?**

- No
- yes
- I don't know

**Is it normal for gums to swell some times ?**

- No
- yes
- I don't know

**Do You get access to information about dental service?**

- Yes
- No

**Where do you get this information?**

- Radio
- TV
- News paper
- Social media
- Friends
- Family
- Health workers

**Have you visited a dental clinic in the last Six months for any reason?**

- Yes
- No

**Which of the following conditions is that?**

*choose all that apply*

- Gum disease and Dental caries (cavities on the teeth)
- Tooth pain
- Jaw Fractures
- Missing teeth
- Stained teeth
- Discolored tooth
- Mouth ulcerations
- Smelling mouth
- Dry mouth
- Abnormal growth of teeth and gum

**Do you face any challenges accessing the dental services?**

- lack of financial support
- lack of social support
- culture doesnt accept
- lack of transport
- I dont know where to go
- others

**please specify the challenge**

---

**Do you brush your teeth?**

- Yes
- No

**When do you brush your teeth ?**

- After every meal
- In the morning
- In the evening
- Any time
- When i feel like
- I dont

**Does your culture prevent you from going to a dental clinic?**

- Yes
- No

**Health system factors****How far is your nearest dental clinic in KM?***estimate*

---

**Which type of facility is it?**

- Government
- private
- Private not for profit
- I dont know

**According to you are the services expensive in that facility?**

- Yes
- No

**are the dental equipments and utilities available in that dental facility?**

- Yes
- No
- Not sure

**Are the services friendly?**

- Yes
- No

**Are the health workers always available?**

- Yes
- No

**How is the quality of service at those facilities ?**

- Good
- Not Good

**According to you are those health workers competent?**

- Yes
- No

## attitudes

**It is not good to bother visiting a dentist when you have no tooth problems**

—————  —————  —————  —————

I strogily agree                      I agree                      Nuetral                      I disagree                      I strongly Disagree

**Dental services are expensive**

—————  —————  —————  —————

I strogily agree                      I agree                      Nuetral                      I disagree                      I strongly Disagree

**Dental services are offered by un friedily providers**

—————  —————  —————  —————

I strogily agree                      I agree                      Nuetral                      I disagree                      I strongly Disagree

**Dental health services are difficult to find**

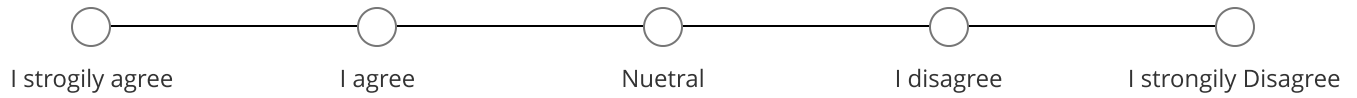

**Good dental health services are not in Lira District**

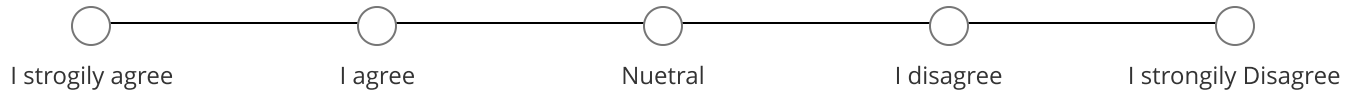

**Children should not visit dentists when they start loosing teeth because it is normal**

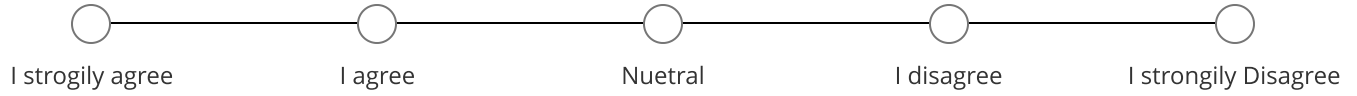

**is there any additional information you would like to share with me about dental survices in lira city? please share with me**

---
